# Supplementary material
Source: publisher figshare collection journal article supplement (https://acs.figshare.com/ndownloader/files/22358640)
Supplement: Supplementary file 1 [file 22358640]

## **Supplementary information**

### **Recyclable High Performance Epoxy Composites Based on Double Dynamic Carbon-Nitrogen and Disulfide bonds**

Quan Zhou,<sup>\*,†</sup> Xiaojuan Zhu,<sup>†</sup> Wenhua Zhang,<sup>†</sup> Ning Song,<sup>†</sup>  
Lizhong Ni<sup>†</sup>

*<sup>†</sup> School of Materials Science and Engineering, East China University of Science and  
Technology, Shanghai 200237, China.*

*\*E-mail addresses: qzhou@ecust.edu.cn*

The DSC curve of the curing agent and epoxy resin showed that the curing exothermic peak of the resin was 207 °C.

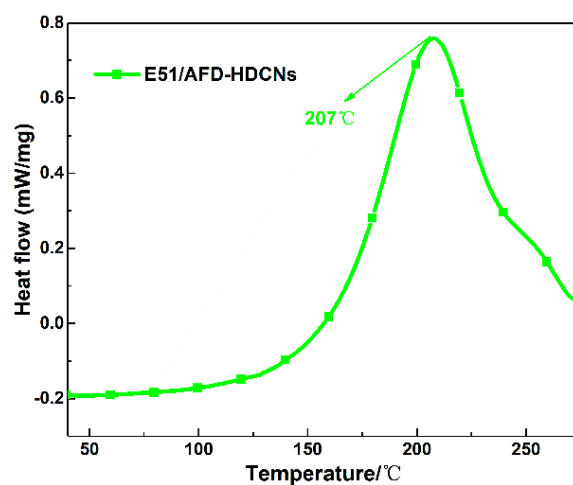

**Figure S1** DSC curves of E51/AFD-HDCNs curing process (heating rate = 10 °C/min, nitrogen, flow rate = 20mL/min)

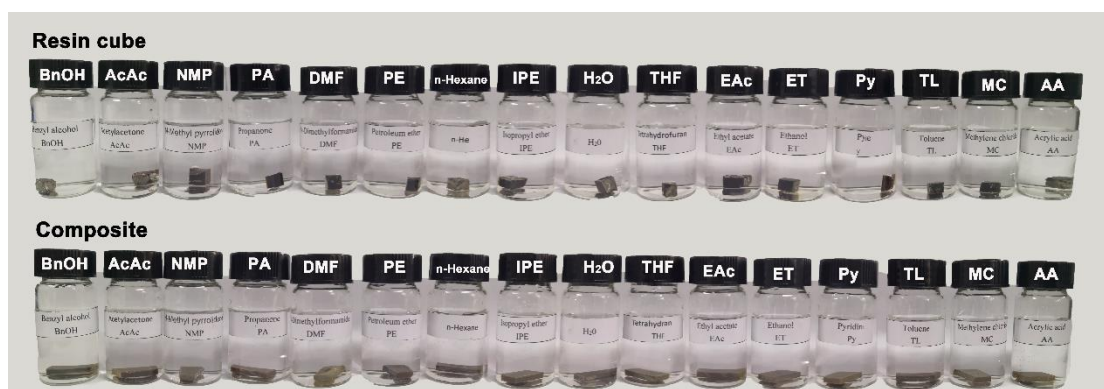

**Figure S2.** Samples soaked in different solvents (0 day)

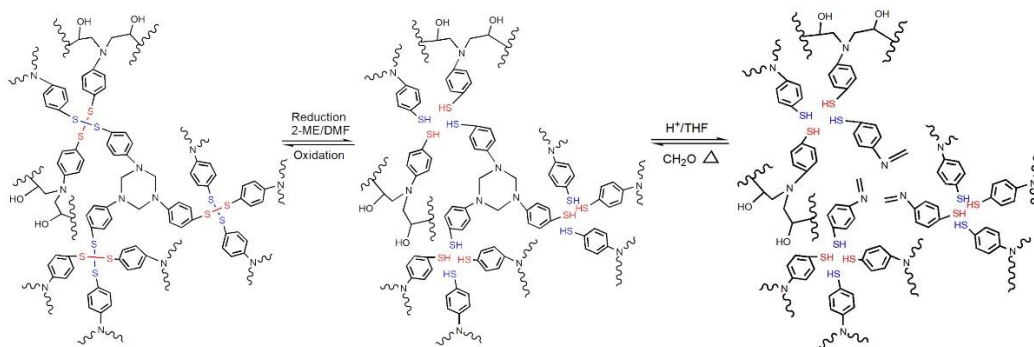

**Figure S3.** The degradation mechanism diagram of E51/AFD-HDCNs

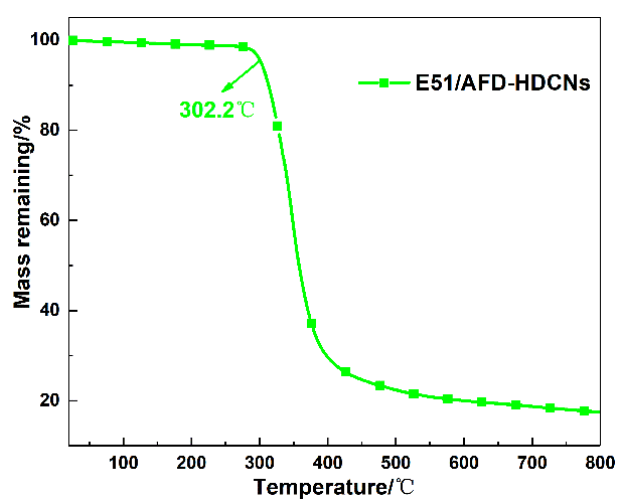

**Figure S4.** TGA curves of E51/AFD-HDCNs (heating rate = 10 °C/min, nitrogen, flow rate = 20mL/min)

Table S1 shows the static contact angle( $\theta$ ) of the different solvents to the resin as measured by the room temperature static drop method.

Table S1. Contact angles of different solvents on the surface of the resin

| Solvent                     | Volume<br>ratio | Resin contact Angle number( $^{\circ}$ ) |                |
|-----------------------------|-----------------|------------------------------------------|----------------|
|                             |                 | E51/AFD                                  | E51/AFD-HDCNs  |
| 2-ME:DMF                    | 2:8             | 2.0 $\pm$ 2.8                            | 16.2 $\pm$ 0.2 |
| 2-ME:DMF                    | 5:5             | 14.9 $\pm$ 1.1                           | 20.3 $\pm$ 1.4 |
| 2-ME:DMF                    | 8:2             | 13.3 $\pm$ 0.7                           | 26.0 $\pm$ 0.3 |
| 2-ME:DMF                    | 1:0             | 18.4 $\pm$ 3.5                           | 29.6 $\pm$ 1.0 |
| H <sup>+</sup> (3mol/L):THF | 2:8             | 21.1 $\pm$ 3.7                           | 17.9 $\pm$ 1.4 |
| H <sup>+</sup> (3mol/L):THF | 5:5             | 19.5 $\pm$ 2.1                           | 27.0 $\pm$ 1.5 |
| H <sup>+</sup> (3mol/L):THF | 8:2             | 33.5 $\pm$ 1.7                           | 35.1 $\pm$ 1.2 |
| H <sup>+</sup> (3mol/L):THF | 1:0             | 52.3 $\pm$ 1.4                           | 59.7 $\pm$ 1.5 |
